# Supplementary material
Source: Springer Nature journal article supplement (https://www.springermedizin.de/resource/supplementary/12967_2008_338_MOESM2_ESM.pdf/9576252)

**A)**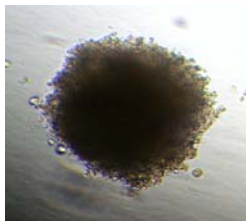**B)**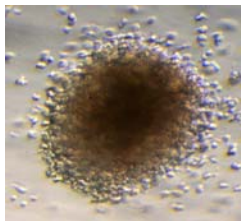**C)**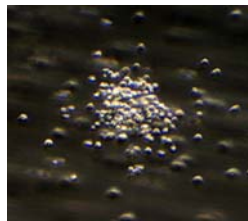**D)**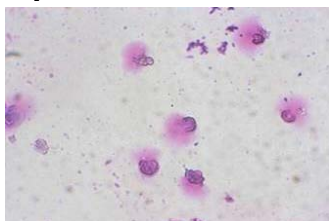**E)**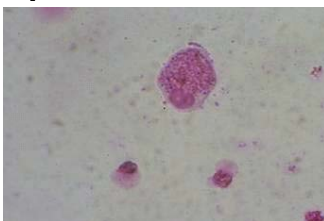**F)**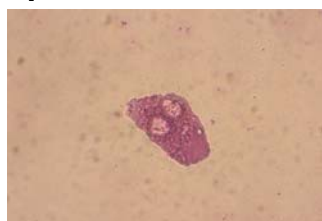**G)**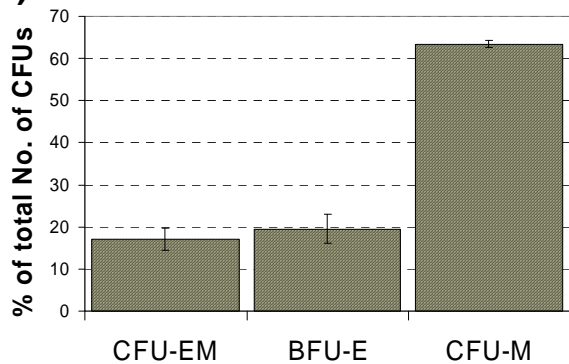**H)**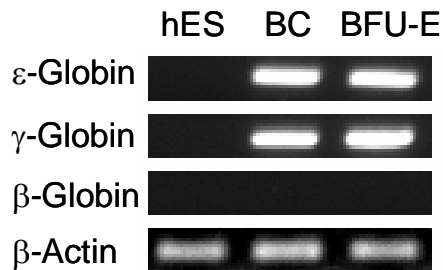

Supplement: MOESM2 [file 9576252]
